# Supplementary material
Source: Springer Nature journal article supplement (https://www.springermedizin.de/resource/supplementary/12939_2010_159_MOESM1_ESM.pdf/9551672)
Supplement: MOESM1 [file 9551672]

Predisposing factors

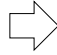

Enabling factors

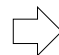

Need/Illness Level

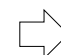

Health Seeking Behavior

Socio-Demographic

- Age of mother
- Parity of mother
- Education of mother
- Education of father
- Husband's occupation
- Access to mass media
- Woman's decision making power

Family and Individual Resources

- Wealth index
- Land ownership
- Contact with health worker
- Microcredit member

Community Resources

- Proximity to FWC
- Proximity to thana headquarters
- Pharmacy

Health Conditions

- Pre-natal stage
- Post-natal stage
- Child fever

Curative and Preventive Care

- ANC by trained providers
- PNC by trained providers
- Trained child delivery care
- Newborn health checkup
- Mother given Vit A
- Treatment for cough and fever by trained providers
